# Supplementary material for: Systematic review of the literature on the effectiveness of product reformulation measures to reduce the sugar content of food and drink on the population's sugar consumption and health: a study protocol
Source: PubMed Central journal article supplement — BMJ Open. 2016 Jun 9;6(6):e011052. doi: 10.1136/bmjopen-2016-011052 (PMC4908876; doi:10.1136/bmjopen-2016-011052), 2016-06-09
Supplement: bmjopen-2016-011052supp1.pdf [file bmjopen-2016-011052supp1.pdf]

## Draft search strategy for EMBASE

#15 #3 AND #12 AND [1990-2016]/py AND [english]/lim

#14 #3 AND #12 AND [1990-2016]/py

#13 #3 AND #12

#12 #10 OR #11

#11 (food OR drink OR beverage\*) AND (formulat\* OR reformulat\*)

#10 #8 AND #9

#9 (adjust\* OR alter\* OR change OR changing OR control\* OR decreas\* OR limit\* OR modify OR modified OR new OR reduce OR reducing OR reduction\* OR reformulat\* OR redevelop\* OR restrict\*)

NEAR/10 (recipe\* OR food\* OR drink\* OR beverage\* OR formula\* OR ingredient\*)

#8 #4 OR #6 OR #7

#7 food\* AND industry

#6 drink\* AND industry

#4 beverage\* AND industry

#3 #1 OR #2

#2 sugar\* NEAR/10 (reduc\* OR less\* OR target\$ OR cutback\* OR decreas\* OR limit\*)

#1 sugar\* NEAR/10 (diet\* OR nutrition\* OR food\* OR intake OR consum\*)
